# Supplementary material
Source: publisher site journal article supplement (https://www.dovepress.com/article/341806)
Supplement: Supplementary file 1 [file get_supplementary_file.php]

**APPENDIX**

**Supplementary Table 1**

| Table 1 | **Specific AD Diagnostic Codes in the DNPR**  AD Type A (*DI710A*) / AD Type B (*DI710B*) | | | **Unspecific AD Diagnostic Code in the DNPR**  Unspecified AD (*DI710*) | | |
| --- | --- | --- | --- | --- | --- | --- |
| **Confirmed AD** | **DNPR** | **PPV** (95% CI) | **Confirmed AD** | **DNPR** | **PPV** (95% CI) |
| **Capital Region of Denmark** *(n=1.9 mil)* |  |  |  |  |  |  |
| Overall | 332 | 367 | 90.5% (87.0-93.3) | 508 | 740 | 68.6% (65.2-72.0) |
| - Type A | 199 | 220 | 90.5% (85.8-94.0) | 316 | - | - |
| - Type B | 132 | 147 | 89.8% (83.7-94.2) | 176 | - | - |
| - Unspecified ADA | 1 | - | *N/A* | 16 | - | - |
| **Region of Zealand** *(n=0.8 mil)* |  |  |  |  |  |  |
| Overall | 17 | 21 | 81.0% (58.1-94.6) | 33 | 78 | 42.3% (31.2-54.0) |
| - Type A | 7 | 10 | 70.0% (34.8-93.3) | 18 | - | - |
| - Type B | 10 | 11 | 90.9% (58.7-99.8) | 15 | - | - |
| - Unspecified ADA | 0 | - | *N/A* | 0 | - | - |
| **Region of Southern Denmark** *(n=1.2 mil)* |  |  |  |  |  |  |
| Overall | 274 | 295 | 92.9% (89.3-95.5) | 173 | 270 | 64.1% (58.0-69.8) |
| - Type A | 158 | 170 | 92.9% (88.0-96.3) | 84 | - | - |
| - Type B | 116 | 125 | 92.8% (86.8-96.7) | 83 | - | - |
| - Unspecified ADA | 0 | - | *N/A* | 6 | - | - |
| **Region of Central Denmark** *(n=1.3 mil)* |  |  |  |  |  |  |
| Overall | 234 | 270 | 86.7% (82.0-90.5) | 212 | 343 | 61.8% (56.4-67.0) |
| - Type A | 135 | 152 | 88.8% (82.7-93.3) | 134 | - | - |
| - Type B | 99 | 118 | 83.9% (76.0-90.0) | 78 | - | - |
| - Unspecified ADA | 0 | - | *N/A* | 0 | - | - |
| **Region of Northern Denmark** *(n=0.6 mil)* |  |  |  |  |  |  |
| Overall | 70 | 83 | 84.3% (74.7-91.4) | 81 | 155 | 52.3% (44.1-60.3) |
| - Type A | 41 | 46 | 89.1% (76.4-96.4) | 59 | - | - |
| - Type B | 29 | 37 | 78.4 % (61.8-90.2) | 21 | - | - |
| - Unspecified ADA | 0 | - | *N/A* | 1 | - | - |
| **Notes**: Overview of positive predictive values for aortic dissections registered in the DNPR from 2006-2016 stratified by specific aortic dissection codes and unspecific aortic dissection code. Confirmed aortic dissections from the medical records are used as ‘golden standard’. The *n* written in parenthesis indicate number of Danish inhabitants per Region as of January 2021.  AAn unspecified aortic dissection was registered when an aortic dissection was validated in the medical records, but it was not possible to determine specific type.  Aortic Dissection (AD), Confidence Interval (CI), Danish National Patient Registry (DNPR), Positive Predicted Value (PPV) | | | | | | |

**Supplementary Table 2**

| **Table 2** | **Specific AD Diagnostic Codes in the DNPR**  AD Type A (*DI710A*) / AD Type B (*DI710B*) | | | | **Unspecific AD Diagnostic Code in the DNPR**  Unspecified AD (*DI710*) | | | |
| --- | --- | --- | --- | --- | --- | --- | --- | --- |
| **Confirmed AD** | **DNPR** | **PPV** (95% CI) | **P** | **Confirmed AD** | **DNPR** | **PPV** (95% CI) | **P** |
| **Age** |  |  |  |  |  |  |  |  |
| *AD overallA* |  |  |  |  |  |  |  |  |
| - <50 years | 119 | 133 | 89.5% (83.0-94.1) | **0.049** | 107 | 160 | 66.9% (59.0-74.1) | **<0.001** |
| - 50-59 years | 144 | 154 | 93.5% (88.4-96.8) | 174 | 242 | 71.9% (65.8-77.5) |
| - 60-69 years | 298 | 326 | 91.4% (87.8-94.2) | 273 | 408 | 66.9% (62.1-71.5) |
| - >70 years | 366 | 423 | 86.5% (82.9-89.6) | 453 | 776 | 58.4% (54.8-61.9) |
| *AD Type A* |  |  |  |  |  |  |  |  |
| - <50 years | 82 | 91 | 90.1% (82.1-95.4) | 0.84 | 77 | - | - | - |
| - 50-59 years | 96 | 106 | 90.6% (83.3-95.4) | 125 | - | - | - |
| - 60-69 years | 167 | 182 | 91.8% (86.8-95.3) | 183 | - | - | - |
| - >70 years | 195 | 219 | 89.0% (84.1-92.9) | 226 | - | - | - |
| *AD Type B* |  |  |  |  |  |  |  |  |
| - <50 years | 37 | 42 | 88.1% (74.4-96.0) | **0.013** | 28 | - | - | - |
| - 50-59 years | 48 | 48 | 100.0% (92.6-100.0) | 47 | - | - | - |
| - 60-69 years | 130 | 144 | 90.3% (84.2-94.6) | 86 | - | - | - |
| - >70 years | 171 | 204 | 83.8% (78.0-88.6) | 212 | - | - | - |
| **Sex** |  |  |  |  |  |  |  |  |
| *AD overallA* |  |  |  |  |  |  |  |  |
| - Women | 328 | 375 | 87.5% (83.7-90.6) | 0.11 | 342 | 552 | 62.0% (57.8-66.0) | 0.35 |
| - Men | 599 | 661 | 90.6% (88.1-92.7) | 665 | 1,034 | 64.3% (61.3-67.2) |
| *AD Type A* |  |  |  |  |  |  |  |  |
| - Women | 196 | 220 | 89.1% (84.2-92.9) | 0.45 | 199 | *-* | - | - |
| - Men | 344 | 378 | 91.0% (87.7-93.7) | 412 | *-* | - | - |
| *AD Type B* |  |  |  |  |  |  |  |  |
| - Women | 132 | 155 | 85.2% (78.6-90.4) | 0.16 | 132 | *-* | - | - |
| - Men | 254 | 283 | 89.8% (85.6-93.0) | 241 | *-* | - | - |
| **Notes:** Positive predicted values of diagnostic codes for aortic dissections (AD) registered in the Danish National Patient Registry (DNPR) from 2006 to 2016, using medical records as 'golden standard’ references. PPVS are stratified by the specific and unspecific diagnostic codes. Furthermore, results are stratified by calendar time, age, and sex. P-values are derived from Pearson’s chi-squared test. A p-value <0.05 is considered significant and is written in **bold**.  AThe overall AD includes the unspecified validated dissections from the medical record review.  Aortic Dissection (AD), Confidence Interval (CI), the Danish National Patient Registry (DNPR), Positive Predicted Value (PPV) | | | | | | | | |
